# Supplementary material
Source: PubMed Central journal article supplement (PMC3467196)
Supplement: NIHMS49766-supplement-1.pdf [file NIHMS49766-supplement-1.pdf]

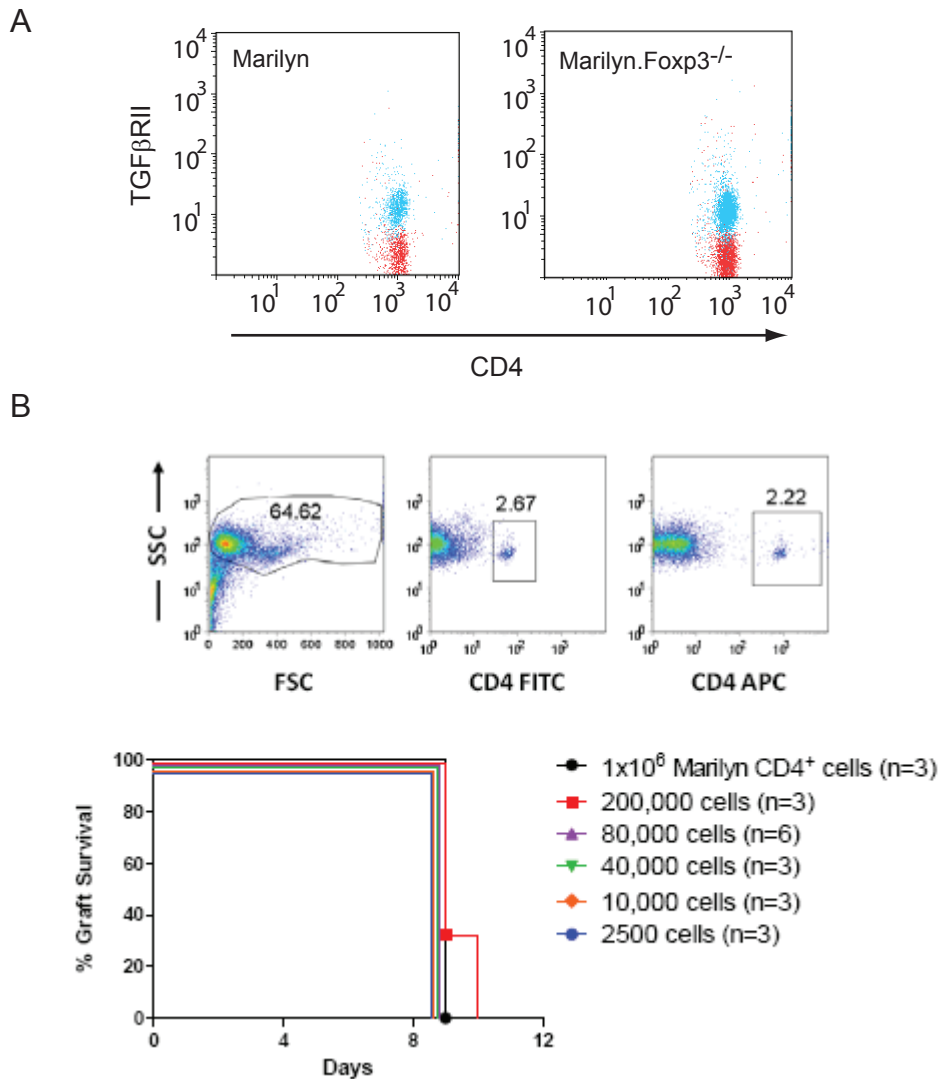

### Supplementary Figure 1

#### A. Marilyn.Foxp3<sup>-/-</sup> CD4<sup>+</sup> T cells express similar levels of TGFβRII to wildtype Marilyn CD4<sup>+</sup> T cells.

Splenic CD4<sup>+</sup> T cells from Marilyn or Marilyn.Foxp3<sup>-/-</sup> were stained with anti-CD4-APC and anti-TGFβRII-PE. Red dots represent control isotype (PE) staining, blue dots represent staining for TGFβRII.

#### B. Very few Marilyn CD4<sup>+</sup> T cells are needed to reject a male skin graft in female B6.Rag<sup>-/-</sup> recipients.

FACS analysis was performed to determine the proportion of CD4<sup>+</sup> cells in female Marilyn spleens. Splenocytes were stained with both anti-CD4-FITC and anti-CD4-PE antibodies and an average of the two was deemed as the CD4<sup>+</sup> percentage (2.4%). Whole splenocytes containing the required number of CD4<sup>+</sup> cells were then transferred into female B6.Rag<sup>-/-</sup> recipients. Various numbers of CD4<sup>+</sup> cells were transferred and the mice grafted with a male CBA.Rag<sup>-/-</sup> skin on the following day. Grafts were monitored on a daily basis. Difference in rejection kinetics between the groups was not statistically significant.
